# Supplementary material
Source: Royal Society of Chemistry journal article supplement (doi:10.1039/d6nj00981f)
Supplement: d6nj00981f1.pdf [file d6nj00981f1.pdf]

## Calculation of carbon emissions

The CO<sub>2</sub> emissions associated with electricity consumption during the extraction process were calculated using the emission factor method based on the following formula

$$E_{CO_2} = EC \times EF$$

Among them  $E_{CO_2}$  is the CO<sub>2</sub> emission (g CO<sub>2</sub>), EC is the electricity consumption (kWh), EF is the CO<sub>2</sub> emission factor.

According to the "Announcement on the Release of 2023 Carbon Dioxide Emission Factors for Electricity" jointly issued by the Ministry of Ecology and Environment of China and the National Bureau of Statistics (Announcement No. 47, 2025), the national fossil energy power CO<sub>2</sub> emission factor for 2023 is 0.8273 kg CO<sub>2</sub>/kWh (827.3 g CO<sub>2</sub>/kWh). According to the default value for grid-connected renewable power generation in the Clean Development Mechanism (CDM) method ACM0002, the figure of 800 g of CO<sub>2</sub> per kWh was adopted.

## Supplementary figures

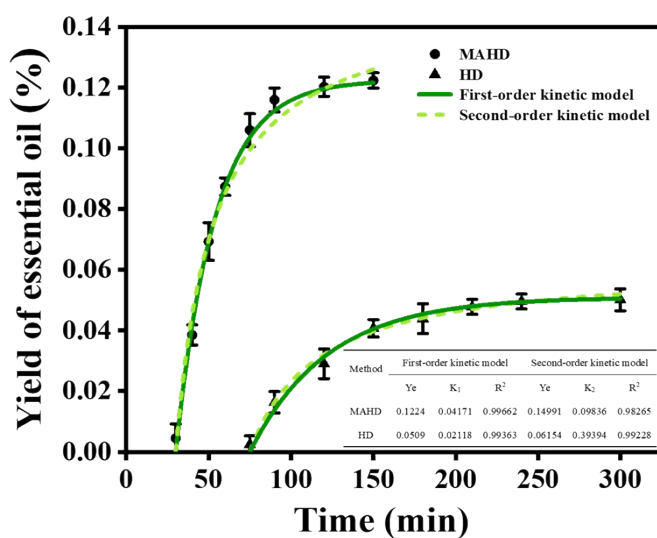

Figure S1 Kinetic profiles of essential oil extraction from Maojian tea leaves using different method.



## Supplementary table

Table S1 Factors and levels in the experiment

| Level | Experimental Factor                       |                    |
|-------|-------------------------------------------|--------------------|
|       | Solid-to-liquid Ratio/ g·mL <sup>-1</sup> | Microwave Power/ W |
| -1    | 1:3                                       | 252                |
| 0     | 1:4                                       | 406                |
| 1     | 1:5                                       | 567                |

Table S2 Experiment design and result of response surface method analysis.

| Run | A   | B   | Yield of essential oil / % |
|-----|-----|-----|----------------------------|
| 1   | 406 | 1:4 | 0.1252                     |
| 2   | 252 | 1:5 | 0.0560                     |
| 3   | 406 | 1:4 | 0.1201                     |
| 4   | 252 | 1:4 | 0.0805                     |
| 5   | 406 | 1:5 | 0.0793                     |
| 6   | 406 | 1:3 | 0.0607                     |
| 7   | 406 | 1:4 | 0.1225                     |
| 8   | 406 | 1:4 | 0.1209                     |
| 9   | 567 | 1:4 | 0.1073                     |
| 10  | 406 | 1:4 | 0.1178                     |
| 11  | 567 | 1:5 | 0.0847                     |
| 12  | 567 | 1:3 | 0.0658                     |
| 13  | 252 | 1:3 | 0.0565                     |

Table S3 Variance analysis for the established regression model.

| Source                         | Sum of Squares | Degree of freedom | Mean square            | F-value | p-value | Significance |
|--------------------------------|----------------|-------------------|------------------------|---------|---------|--------------|
| Model                          | 0.0091         | 5                 | 0.0018                 | 191.54  | <0.0001 | ***          |
| A                              | 0.0007         | 1                 | 0.0007                 | 73.98   | <0.0001 | ***          |
| B                              | 0.0003         | 1                 | 0.0003                 | 26.91   | 0.0013  | **           |
| AB                             | 0.0001         | 1                 | 0.0001                 | 9.85    | 0.0164  | *            |
| A <sup>2</sup>                 | 0.0028         | 1                 | 0.0028                 | 291.14  | <0.0001 | ***          |
| B <sup>2</sup>                 | 0.0048         | 1                 | 0.0048                 | 508.39  | <0.0001 | ***          |
| Residual                       | 0.0001         | 7                 | 9.460×10 <sup>-6</sup> |         |         |              |
| Lack of fit                    | 0.0000         | 3                 | 0.0000                 | 1.56    | 0.3301  |              |
| Pure error                     | 0.0000         | 4                 | 7.625×10 <sup>-6</sup> |         |         |              |
| Cor Total                      | 0.0091         | 12                |                        | -       |         |              |
| R <sup>2</sup>                 |                |                   |                        |         | 0.9927  |              |
| R <sup>2</sup> <sub>Adj</sub>  |                |                   |                        |         | 0.9876  |              |
| R <sup>2</sup> <sub>Pred</sub> |                |                   |                        |         | 0.9650  |              |

\* p < 0.05, significant; \*\* p < 0.01, highly significant; \*\*\* p < 0.001, extremely significant.
